# Supplementary material for: Magnetic Resonance Imaging Allows the Evaluation of Tissue Damage and Regeneration in a Mouse Model of Critical Limb Ischemia
Source: PLOS journal article supplement (doi:10.1371/journal.pone.0142111), 2015-11-10
Supplement: S5 (10.1371/journal.pone.0142111.s005) [file journal.pone.0142111.s005.PDF]

|                                   |                 | Day 1    | Day 3  | Day 5  | Day 7   | Day 14 | Day 21 | Day28 |
|-----------------------------------|-----------------|----------|--------|--------|---------|--------|--------|-------|
| <b>T2-rt (msec)</b>               | <b>Gas I</b>    | 39.49    | 39.13  | 38.58  | 36.84   | 35.62  | 33.84  | 33.13 |
|                                   | <b>Gas NI</b>   | 29.16    | 29.37  | 30.03  | 29.40   | 29.59  | 29.39  | 29.07 |
|                                   | <b><i>P</i></b> | 0.002    | 0.004  | 0.009  | 0.02    | 0.07   | 0.12   | 0.14  |
|                                   | <b>TA I</b>     | 44.09    | 45.92  | 47.28  | 45.73   | 36.83  | 34.19  | 32.40 |
|                                   | <b>TA NI</b>    | 29.44    | 30.03  | 29.75  | 29.65   | 28.80  | 28.61  | 28.20 |
|                                   | <b><i>P</i></b> | 0.00003  | 0.0001 | 0.0002 | 0.00006 | 0.003  | 0.03   | 0.12  |
| <b>F.A. (a.u.)</b>                | <b>Gas I</b>    | 0.18     | 0.18   | 0.22   | 0.22    | 0.24   | 0.25   | 0.25  |
|                                   | <b>Gas NI</b>   | 0.25     | 0.24   | 0.25   | 0.25    | 0.24   | 0.24   | 0.24  |
|                                   | <b><i>P</i></b> | 0.006    | 0.01   | 0.13   | 0.32    | 0.73   | 0.64   | 0.72  |
|                                   | <b>TA I</b>     | 0.14     | 0.15   | 0.21   | 0.25    | 0.28   | 0.31   | 0.30  |
|                                   | <b>TA NI</b>    | 0.26     | 0.26   | 0.27   | 0.27    | 0.28   | 0.26   | 0.27  |
|                                   | <b><i>P</i></b> | 0.000006 | 0.0004 | 0.03   | 0.60    | 0.92   | 0.02   | 0.07  |
| <b>K-trans (min<sup>-1</sup>)</b> | <b>Gas I</b>    | 0.022    | 0.036  | 0.034  | 0.043   | 0.039  | 0.057  | 0.041 |
|                                   | <b><i>P</i></b> | 0.00001  | 0.4    | 0.7    | 0.8     | 0.6    | 0.4    | 0.3   |
|                                   | <b>TA I</b>     | 0.030    | 0.037  | 0.020  | 0.060   | 0.059  | 0.071  | 0.074 |
|                                   | <b><i>P</i></b> | 0.001    | 0.02   | 0.1    | 0.4     | 0.7    | 0.04   | 0.3   |

**S 1 Table** MRI parameters of Tibialis anterior (TA) and Gastrocnemius (Gas) muscles, both ischemic (I) and non-ischemic (NI) measured after femoral artery dissection. Results are reported as average values of T2-rt (msec), FA (arbitrary units) and K-trans (min<sup>-1</sup>). The statistical significance (P) was calculated by Student's T test comparing ischemic and non-ischemic controlateral muscles.
